# Supplementary material for: Cross-sectional analysis of CD8 T cell immunity to human herpesvirus 6B
Source: PubMed Central journal article supplement (PMC5919459; doi:10.1371/journal.ppat.1006991), 2018-04-26
Supplement: ppat.1006991.s002.pdf [file ppat.1006991.s002.pdf]

**S2 Table:** Characteristics of allo-HSCT patients, donors, and transplantation procedures.

| <b>Characteristics</b>      | <b>Patient 1</b>        | <b>Patient 2</b>   | <b>Patient 3</b> |
|-----------------------------|-------------------------|--------------------|------------------|
| Patient age, years          | 30                      | 43                 | 18               |
| Patient sex                 | female                  | female             | female           |
| Underlying disease          | SAA                     | AML                | SAA              |
| Donor sex                   | male                    | female             | male             |
| CMV serostatus              |                         |                    |                  |
| Donor / Recipient           | neg / neg               | neg / neg          | neg / neg        |
| Donor type                  | unrelated               | unrelated          | unrelated        |
| HLA match                   | matched                 | matched            | matched          |
| Graft source                | PBSCs                   | PBSCs              | BM               |
| Conditioning regimen        | RIC                     | RIC                | RIC              |
| GvHD prophylaxis            | ATG-CyA-Sir             | ATG-CyA-MMF        | ATG-CyA-Sir      |
| Neutrophil engraftment, day | 105                     | 23                 | 60               |
| aGvHD                       | grade II                | grade I            | none             |
| aGvHD onset, day            | 115                     | 14                 | -                |
| HHV-6 treatment             | foscarnet,<br>cidofovir | none               | none             |
| Viral coinfection           | EBV                     | EBV,<br>adenovirus | adenovirus       |

Abbreviations: neg, negative; SAA, severe aplastic anemia; AML, acute myeloid leukemia; HLA, human leukocyte antigen; PBSCs, peripheral blood stem cells; BM, bone marrow; RIC, reduced intensity conditioning; ATG, anti-thymocyte globulin; CyA, cyclosporine A; Sir, Sirolimus; aGVHD, acute graft-versus-host disease; EBV, Epstein-Barr virus.
